# Supplementary material for: Genetic Modifiers of Chromatin Acetylation Antagonize the Reprogramming of Epi-Polymorphisms
Source: PLOS journal article supplement (doi:10.1371/journal.pgen.1002958), 2012-09-20
Supplement: S1 (10.1371/journal.pgen.1002958.s001) [file journal.pgen.1002958.s001]

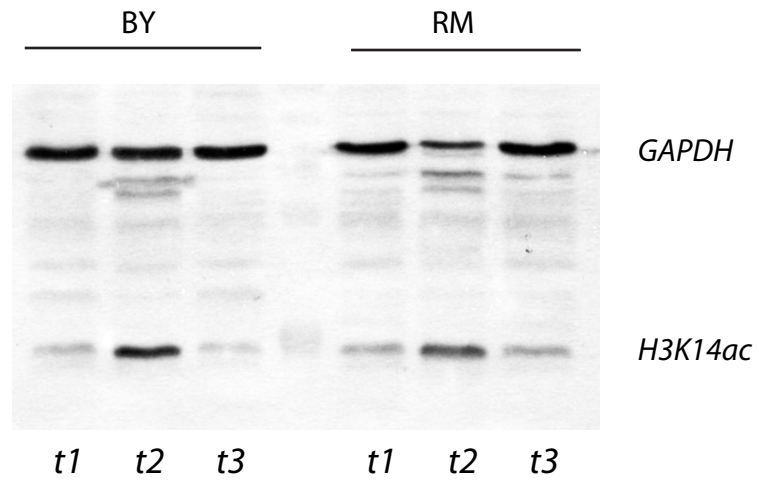

Figure S1
