# Supplementary material for: Genetic Modifiers of Chromatin Acetylation Antagonize the Reprogramming of Epi-Polymorphisms
Source: PLOS journal article supplement (doi:10.1371/journal.pgen.1002958), 2012-09-20
Supplement: S2 (10.1371/journal.pgen.1002958.s002) [file journal.pgen.1002958.s002]

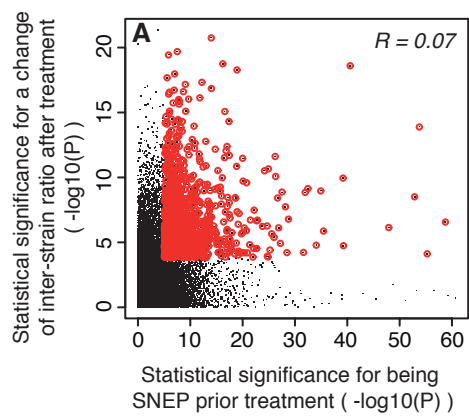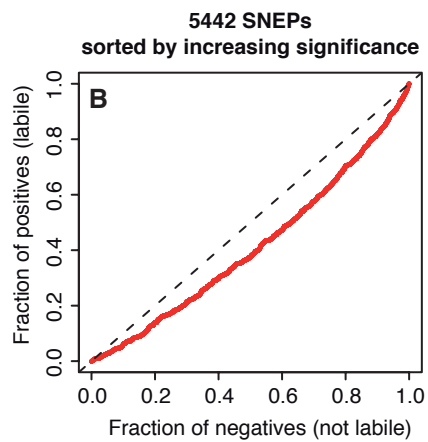

Figure S2
